# Supplementary material for: HFMI effectiveness at high stress ratios (R = 0.55–0.70) in four-point bending of high-strength steel butt welds
Source: Research Square preprint supplement (doi:10.21203/rs.3.rs-7613878/v1), 2025-10-13
Supplement: Supplementary file 1 [file 099afe990c66a80573695ecb.docx]

# Annex

Table A1 Results for specimens at R = 0.55

| Specimen | Material | Type of weld | HFMI | R (stress ratio) | Stress range [MPa] | Number of cycles [-] | Broken/runout |
| --- | --- | --- | --- | --- | --- | --- | --- |
| 1* | S355J2+N | V | NO | 0.55 | 200 | 742,850 | broken |
| 2* | S355J2+N | V | YES | 0.55 | 200 | 1,149,325 | broken |
| 3 | S355J2+N | V | NO | 0.55 | 100 | 10,000,000 | broken |
| 4 | S355J2+N | V | YES | 0.55 | 150 | 2,470,873 | broken |
| 5 | S355J2+N | V | NO | 0.55 | 120 | 1,547,686 | broken |
| 6 | S355J2+N | V | YES | 0.55 | 120 | 10,000,000 | runout |
| 7* | S355J2+N | X | NO | 0.55 | 200 | 548,478 | broken |
| 8* | S355J2+N | X | YES | 0.55 | 200 | 1,309,158 | broken |
| 9 | S355J2+N | X | NO | 0.55 | 100 | 9,807,750 | broken |
| 10 | S355J2+N | X | YES | 0.55 | 150 | 10,000,000 | broken |
| 11 | S355J2+N | X | NO | 0.55 | 120 | 2,800,255 | broken |
| 12* | S460NL | V | NO | 0.55 | 250 | 560,358 | broken |
| 13* | S460NL | V | YES | 0.55 | 250 | 10,000,000 | runout |
| 14* | S460NL | V | NO | 0.55 | 300 | 158,829 | broken |
| 15* | S460NL | V | YES | 0.55 | 300 | 176,110 | broken |
| 16 | S460NL | V | NO | 0.55 | 120 | 10,000,000 | runout |
| 17 | S460NL | V | YES | 0.55 | 120 | 10,000,000 | runout |
| 18* | S460NL | V | NO | 0.55 | 350 | 174,552 | broken |
| 19* | S460NL | V | YES | 0.55 | 350 | 173,006 | broken |
| 20* | S460NL | V | NO | 0.55 | 320 | 235,346 | broken |
| 21* | S460NL | V | YES | 0.55 | 320 | 205,694 | broken |
| 22 | S460NL | X | NO | 0.55 | 200 | 942,893 | broken |
| 23 | S460NL | X | YES | 0.55 | 200 | 1,762,293 | broken |
| 24* | S460NL | X | NO | 0.55 | 250 | 225,358 | broken |
| 25* | S460NL | X | YES | 0.55 | 250 | 781,250 | broken |
| 26 | S460NL | X | NO | 0.55 | 200 | 661,924 | broken |
| 27 | S460NL | X | YES | 0.55 | 200 | 1,496,308 | broken |
| 28* | S460NL | X | NO | 0.55 | 300 | 288,437 | broken |
| 29* | S460NL | X | YES | 0.55 | 300 | 200,823 | broken |
| 30* | S460NL | X | NO | 0.55 | 350 | 109,319 | broken |
| 31* | S460NL | X | YES | 0.55 | 350 | 75,445 | broken |
| 32 | S690QL | V | NO | 0.55 | 300 | 213,865 | broken |
| 33 | S690QL | V | YES | 0.55 | 300 | 296,846 | broken |
| 34 | S690QL | V | NO | 0.55 | 200 | 44,861 | broken |
| 35 | S690QL | V | YES | 0.55 | 200 | 10,000,000 | runout |
| 36 | S690QL | V | NO | 0.55 | 160 | 1,984,822 | broken |
| 37 | S690QL | V | YES | 0.55 | 250 | 704,116 | broken |
| 38 | S690QL | X | NO | 0.55 | 200 | 2,674,867 | broken |
| 39 | S690QL | X | YES | 0.55 | 200 | 10,000,000 | runout |
| 40 | S690QL | X | NO | 0.55 | 200 | 1,503,085 | broken |
| 41 | S690QL | X | YES | 0.55 | 200 | 10,000,000 | runout |
| 42 | S690QL | X | NO | 0.55 | 160 | 1,281,214 | broken |
| 43 | S690QL | X | YES | 0.55 | 310 | 610,502 | broken |
| 44 | S960QL | V | NO | 0.55 | 300 | 202,993 | broken |
| 45 | S960QL | V | YES | 0.55 | 300 | 225,095 | broken |
| 46 | S960QL | V | NO | 0.55 | 250 | 315,655 | broken |
| 47 | S960QL | V | YES | 0.55 | 250 | 10,000,000 | runout |
| 48 | S960QL | X | NO | 0.55 | 300 | 103,967 | broken |
| 49 | S960QL | X | YES | 0.55 | 300 | 217,621 | broken |
| 50 | S960QL | X | NO | 0.55 | 300 | 150,522 | broken |
| 51 | S960QL | X | YES | 0.55 | 300 | 489,694 | broken |

*Green text denotes specimens that were loaded beyond the yield strength.

Table A2 Results for specimens at R = 0.07

| Specimen | Material | Type of weld | HFMI | R (stress ratio) | Stress range [MPa] | Number of cycles [-] | Broken/runout |
| --- | --- | --- | --- | --- | --- | --- | --- |
| 52 | S355J2+N | V | NO | 0.7 | 100 | 7,476,982 | broken |
| 53* | S355J2+N | V | YES | 0.7 | 150 | 10,000,000 | runout |
| 54* | S355J2+N | V | NO | 0.7 | 120 | 4,602,920 | broken |
| 55 | S355J2+N | V | YES | 0.7 | 120 | 4,783,683 | broken |
| 56 | S355J2+N | X | NO | 0.7 | 100 | 10,000,000 | runout |
| 57* | S355J2+N | X | YES | 0.7 | 200 | 615,341 | broken |
| 58* | S355J2+N | X | NO | 0.7 | 120 | 10,000,000 | runout |
| 59* | S460NL | V | NO | 0.7 | 200 | 819,488 | broken |
| 60* | S460NL | V | YES | 0.7 | 200 | 1,023,251 | broken |
| 61* | S460NL | V | NO | 0.7 | 250 | 626,710 | broken |
| 62* | S460NL | V | YES | 0.7 | 250 | 248,358 | broken |
| 63* | S460NL | V | NO | 0.7 | 150 | 3,397,500 | broken |
| 64* | S460NL | V | YES | 0.7 | 150 | 10,000,000 | runout |
| 65* | S460NL | X | NO | 0.7 | 200 | 646,522 | broken |
| 66 | S460NL | X | YES | 0.7 | 138 | 10,000,000 | runout |
| 67* | S460NL | X | NO | 0.7 | 250 | 476,049 | broken |
| 68* | S460NL | X | YES | 0.7 | 250 | 310,794 | broken |
| 69* | S460NL | X | YES | 0.7 | 200 | 943,095 | broken |
| 70 | S690QL | V | NO | 0.7 | 200 | 747,916 | broken |
| 71 | S690QL | V | YES | 0.7 | 200 | 1,224,164 | broken |
| 72 | S690QL | V | NO | 0.7 | 160 | 2,169,942 | broken |
| 73 | S690QL | V | YES | 0.7 | 160 | 1,108,369 | broken |
| 74 | S690QL | V | NO | 0.7 | 140 | 4,531,472 | broken |
| 75 | S690QL | V | YES | 0.7 | 140 | 10,000,000 | runout |
| 76 | S690QL | V | NO | 0.7 | 180 | 740,176 | broken |
| 77 | S690QL | V | YES | 0.7 | 180 | 3,474,899 | broken |
| 78 | S690QL | X | NO | 0.7 | 200 | 1,577,035 | broken |
| 79 | S690QL | X | YES | 0.7 | 200 | 1,816,849 | broken |
| 80 | S690QL | X | NO | 0.7 | 160 | 10,000,000 | runout |
| 81 | S690QL | X | YES | 0.7 | 160 | 10,000,000 | runout |
| 82* | S690QL | X | NO | 0.7 | 230 | 790,388 | broken |
| 83* | S690QL | X | YES | 0.7 | 230 | 1,189,101 | broken |
| 84* | S690QL | X | NO | 0.7 | 250 | 479,281 | broken |
| 85* | S690QL | X | YES | 0.7 | 250 | 779,925 | broken |
| 86 | S960QL | V | NO | 0.7 | 250 | 354,287 | broken |
| 87 | S960QL | V | YES | 0.7 | 250 | 723,330 | broken |
| 88 | S960QL | V | NO | 0.7 | 200 | 1,102,446 | broken |
| 89 | S960QL | V | YES | 0.7 | 200 | 1,208,904 | broken |
| 90 | S960QL | X | NO | 0.7 | 250 | 279,686 | broken |
| 91 | S960QL | X | YES | 0.7 | 250 | 967,416 | broken |
| 92 | S960QL | X | NO | 0.7 | 200 | 2,133,184 | broken |
| 93 | S960QL | X | YES | 0.7 | 200 | 2,484,446 | broken |

*Green text denotes specimens that were loaded beyond the yield strength.
